# Supplementary material
Source: HighWire-hosted journal article supplement (https://www.highwirestage.com/highwire/filestream/113219/field_highwire_adjunct_files/0/ajnr.A8486_preprint_supplement.pdf)
Supplement: ajnr.A8486_preprint_supplement.pdf [file ajnr.A8486_preprint_supplement.pdf]

# The association of vascular loops within the internal auditory meatus or contacting the vestibulo-cochlear nerve with audio-vestibular symptoms. A systematic review and meta-analysis.

Jake E Cowen, Mehrshad Sultani Tehrani, Steve EJ Connor.

## ABSTRACT

**Background:** Intrameatal vascular loops (IVL) entering the internal auditory meatus (IAM) and neurovascular contact (NVC) with the vestibulo-cochlear nerve (CN VIII) have been proposed to have a relationship with audio-vestibular symptoms.

**Purpose:** This systematic review and meta-analysis aimed to determine whether the presence of IVLs and CN VIII NVC on magnetic resonance imaging (MRI) is associated with tinnitus, sensorineural hearing loss (SNHL) or vertigo and any specific subtypes.

**Data Sources:** All studies comparing the presence of IVL or CN VIII NVC in ears with these audio-vestibular symptoms and controls were identified through MEDLINE, EMBASE, Web of Science Core Collection, Scopus and Cochrane Register of Controlled Trials databases.

**Study Selection:** 16 studies and 3,455 ears (1526 symptomatic ears and 1929 control ears) were included.

**Data Analysis:** Meta-analysis was performed using a bivariate random effects model. Pooled odds ratios (ORs) were calculated, and heterogeneity was evaluated with Cochran's Q test with statistical significance defined as  $p < 0.05$ .

**Data Synthesis:** There was no significant association between the presence of undefined tinnitus or SNHL and that of IVL (OR 0.90 95% CI 0.47, 1.70; OR 0.67, 95% CI 0.36, 1.25) or CN VIII NVC (OR 1.15, 95% CI 0.68, 1.95; OR 0.89, 95% CI 0.33, 2.40). However, the subgroup of sudden onset SNHL was associated with IVL (OR 1.34, 95% CI 1.04, 1.73) ( $p = 0.02$ ). There was no significant difference in the prevalence of IVL (OR 0.97, 95% CI 0.64, 1.48) or CN VIII NVC (OR 0.99, 95% CI 0.42, 2.32) between ears with undefined vertigo and control ears. However, there was an association between the presence of CN VIII NVC and the specific diagnosis of vestibular paroxysmia (OR 13.19, 95% CI 2.09, 83.16) ( $p = 0.006$ ).

**Limitations:** Our meta-analysis is limited by selection bias, small number of eligible studies and moderate heterogeneity.

**Conclusions:** IVL or CN VIII NVC on MRI are unrelated to symptoms of undefined tinnitus, SNHL and vertigo. However, CN VIII NVC is associated with vestibular paroxysmia whilst IVL is associated with sudden onset SNHL.

**ABBREVIATIONS:** AICA = anterior inferior cerebellar artery, CI = confidence interval, CN = cranial nerve, CPA = cerebellopontine angle, IAM = internal auditory meatus, NVC = neurovascular contact, OR = odds ratio, SNHL = sensorineural hearing loss, SoSNHL = sudden onset sensorineural hearing loss.

Received month day, year; accepted after revision month day, year.

From the Department of Radiology (JEC) Queen Alexandra Hospital, Portsmouth, UK. Faculty of Life Sciences and Medicine (MST) King's College London, UK. School of Biomedical Engineering and Imaging Sciences (SEJC) King's College London, UK. Department of Neuroradiology (SEJC), King's College Hospital NHS Foundation Trust, London, UK. Department of Radiology (SEJC), Guy's and St Thomas' NHS Foundation Trust, London, UK.

Dr Steve EJ Connor has been the recipient of research funding from Rinri Therapeutics Limited.

Please address correspondence to Dr Steve EJ Connor, School of Biomedical Engineering and Imaging Sciences, King's College London, London, SE1 7EH, UK; [steve.connor@kcl.ac.uk](mailto:steve.connor@kcl.ac.uk).

## INTRODUCTION

Vascular loops are frequently identified within the internal auditory meatus (IAM) on magnetic resonance imaging (MRI).

Whilst this is most commonly due to the anterior inferior cerebellar artery, the posterior inferior cerebellar artery, superior cerebellar artery, or venous structures may also be responsible [1]. Authors have speculated that these intrameatal vascular

loops (IVL) may be responsible for tinnitus, sensorineural hearing loss (SNHL) and vertigo [2]. It is hypothesised that such audio-vestibular symptoms may result from altered neural conduction due to CN VIII neurovascular contact (NVC), reduced

vascular perfusion of the nerves due to disturbed blood flow or increased transmission of sound through the CSF of the IAM [1-2]. Symptoms due to NVC are considered to be most common when a vessel contacts the centrally myelinated portion of the cranial nerve or the transition zone between central and peripheral myelin [3].

Determining an association between the presence of an IVL or CN VIII NVC and audio-vestibular clinical presentations would guide the selection of appropriate diagnostic MRI sequences and interpretation of the imaging findings. There are also potential therapeutic implications since vascular decompression surgery has been performed to alleviate such symptoms [4]. An association between these vascular variants and audio-vestibular clinical presentations remains uncertain, with variable outcomes from previous case-controlled studies and with no contemporary pooling of the statistical outcomes.

This systematic review and meta-analysis aimed to determine whether there is an association between IVLs or CN VIII NVC and specific audio-vestibular symptoms.

## **MATERIALS AND METHODS**

This study was performed according to the Preferred Reporting Items for Systematic Reviews and Meta-analyses (PRISMA) guidelines [5] and enrolled on the Prospective Register of Systematic Reviews (PROSPERO), CRD42023447065.

### **Search strategy**

The search strategy was designed using PICOS (population; intervention or exposure; comparator/control; outcome; study design). Population was defined as ears with specific audio-vestibular symptoms; exposure as the presence of a IAM vascular loop or CN VIII NVC; control as ears without audio-vestibular symptoms; outcome as the presence of an IAM vascular loop or CN VIII NVC relative to the reporting of audio-vestibular symptoms; and study design as case-controlled cross-sectional studies. Search terms were adapted after a pilot search to include relevant synonyms (supplementary 1).

Searches were performed in MEDLINE, EMBASE, Web of Science Core Collection, Scopus and Cochrane Register of Controlled Trials databases. The search was performed from database inception onwards. The searches were last performed on 01/08/2023. Manual forward and backward searches were performed for all eligible review articles. The five most frequently cited journals were hand searched (2009–2023) (supplementary 1). EndNote Web© was used as a reference manager to identify and collate the literature and allow for the manual removal of duplicates.

### **Selection of studies**

Two independent reviewers (JC, MST) applied the piloted screening tool to the titles and abstracts with the following inclusion criteria: a defined patient group with audio-vestibular symptoms; analysis using MRI; reference to a vascular loop/variant or anomaly. Case studies, review articles, foreign language literature and duplicated studies were excluded. The full text was independently assessed for eligibility by both reviewers according to the PICOS criteria. Studies were included when there were data that could be extracted into a 2x2 contingency table comparing the presence of an IVL or CN VIII NVC in ears with and without tinnitus, SNHL or vertigo. Since vertigo is not lateralised to either ear, patients with vertigo were compared to

subjects without vertigo, with the prevalence of an IVL or CN VIII NVC in either ear being recorded. When a symptomatic subtype was defined by specific criteria then this was analysed separately.

Reasons for exclusion are listed in supplementary 2. Discrepancies were resolved by discussion (JC, MST, SC).

### **Data extraction**

Two reviewers (JC, MST) independently extracted data regarding (a) study characteristics: authors, year of publication, retrospective v prospective, case and control group size, IVL classification scale applied, specified audio-vestibular symptom(s); (b) control group type: asymptomatic contralateral ears, healthy volunteer ears, or ears of patients with an unrelated condition; (c) demographic and clinical characteristics: age and sex of the case and control groups, unilateral or bilateral cases. Contingency tables (2x2) were constructed comparing the presence of the audio-vestibular symptom (reference standard) and the presence of an IVL or CN VIII NVC on MRI (index test). Details of specific classifications for the assessment of IVL and CN VIII NVC are provided in supplementary 3. Any discrepancies in the data collection were resolved by revisiting the article in a consensus meeting.

### **Quality assessment**

The methodological quality of the eligible studies was evaluated using the Quality Assessment of Diagnostic Accuracy Studies version 2 (QUADAS-2) tool by two independent reviewers (JC, MST) [6]. The signaling questions were tailored specifically to the review (supplementary 4).

### **Statistical analysis**

Bivariate random-effects meta-analysis was performed with R 4.3.1 (package “meta”) and R Studio (Version 2023.09.0+463) to evaluate the association between audio-vestibular symptoms and the presence of an IVL or CN VIII NVC. The results were tabulated with corresponding forest plots. Pooled odds ratios (ORs) were calculated with 95% confidence intervals and p values. Heterogeneity was assessed by Cochran’s Q test. Further quantification of heterogeneity was provided with tau<sup>2</sup> and I<sup>2</sup> statistics. Statistical significance was defined as p<0.05.

## **RESULTS**

### **Systematic review**

The screening tool identified 77 potentially eligible articles. After full text review, 15 studies were included. One additional relevant article was identified via citation searching, totaling 16 eligible studies (Fig 1).

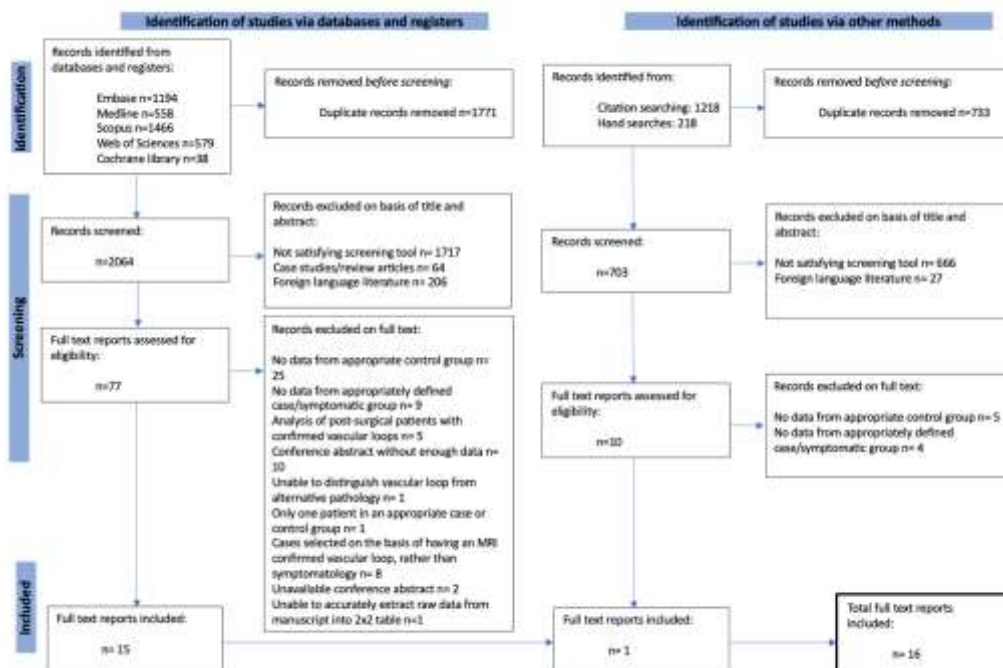

**Figure 1. Flow chart summary of the systematic literature review process.**

## Study characteristics

The demographics of the patients from eligible studies and the number of case (with audio-vestibular symptoms) and control ears are documented in Table 1[1][7-21]. A total of 1526 symptomatic ears and 1929 control ears were included. Mean ages ranged between 43 and 54.1 years. Study characteristics are demonstrated in Table 2. Eligible studies comprised ears with tinnitus (n=5), SNHL (n=7) and vertigo (n= 6). Specific symptomatic subtypes studied were “typewriter tinnitus”, sudden onset sensorineural hearing loss (SoSNHL) and vestibular paroxysmia (VP). The diagnostic criteria for these subtypes are defined in Table 2. Control groups comprised of the contralateral ear (n=8), a normal, asymptomatic patient cohort (n=5) or a patient cohort with an unrelated condition (e.g. trigeminal neuralgia) (n=3).

Eleven papers analysed the relationship of audio-vestibular symptoms with IVL whilst 13 papers analysed the association with CN VIII NVC. The most adopted classification with regard to position of the IVL was that proposed by Chavda in McDermott et al [22]. A standardised classification for NVC was more seldom used, with that established by Gorrie et al adopted in 3 papers [11][Supplementary 3].

**Table 1. Eligible studies patient demographics.**

| Author (year)              | Case ears/Control ears (n) | Bilateral cases included<br>Y/N (n) | Age (cases)         | Sex (cases)  | Age (controls)      | Sex (controls) |
|----------------------------|----------------------------|-------------------------------------|---------------------|--------------|---------------------|----------------|
| Bae (2017) [7]             | 16/14                      | Y (1 bilateral)                     | 54.1 (27-84)        | 5 m/10 f     | N/A                 | N/A            |
| Best (2013) [8]            | 40/40                      | N/A                                 | 47.2 ± 14.7 (17-78) | 8 m/12 f     | 48.4 ± 14.9 (25-77) | 8 m/12 f       |
| Beyazal Celiker (2017) [9] | 356/478                    | N/A                                 | 50.1 ± 17.3         | 63 m/ 115 f  | 42.1 ± 18.9         | 119 m/120 f    |
| Ezerarslan (2019) [10]     | 68/76                      | N                                   | 45.3 ± 14.6 (18-77) | 36 m/ 32 f   | 48.6 ± 14.0 (26-81) | 21 m/17 f      |
| Gorrie (2009) [11]         | 58/56                      | N                                   | NR                  | 31 m/ 27 f   | N/A                 | N/A            |
| Gultekin (2008) [12]       | 68/128                     | Y (13 bilateral)                    | 48.5 (18-78)        | 23 m/ 32 f   | 42.2 (19-88)        | 9 m/34 f       |
| Kierig (2023) [1]          | 36/36                      | N/A                                 | 52.6 ± 18.1 (28-84) | 12 m/ 6 f    | 50.3 ± 16.5         | 5 m/ 13 f      |
| Kim (2019) [13]            | 49/49                      | N                                   | 45.0 ± 15.3         | 58 m/ 40 f   | N/A                 | N/A            |
| Leng (2022) [14]           | 136/136                    | N                                   | 43 ± 13             | 60 m/ 76 f   | N/A                 | N/A            |
| Maruyama (2020) [15]       | 248/392                    | N                                   | 51.1 ± 17.2 (8-84)  | 121 m/ 127 f | 55.2 ± 16.8 (10-84) | 77 m/67 f      |
| Ozan (2017) [16]           | 92/85                      | N/A                                 | 53.6 ± 14.2 (20-84) | 42 m/ 50 f   | 52.2 ± 15 (23-79)   | 39 m/46 f      |
| Peters (2020) [17]         | 48/49                      | N                                   | 52 (23-76)          | 24 m/ 25 f   | N/A                 | N/A            |
| Sivarasan (2019) [18]      | 9/20                       | N                                   | 48.4 ± 14.0         | 5 m/ 4 f     | N/A                 | N/A            |
| Yoo (2011) [19]            | 85/173                     | Y (29 bilateral)                    | 47.3 ± 12.7         | 30 m/ 44 f   | N/A                 | N/A            |
| Zhang (2023) [20]          | 77/77                      | N                                   | 47.6 ± 14.3         | 45 m/ 34 f   | N/A                 | N/A            |

|                   |         |   |                   |            |                     |            |
|-------------------|---------|---|-------------------|------------|---------------------|------------|
| Zidan (2020) [21] | 140/120 | N | 47.6 ± 15 (11-73) | 47 m/ 51 f | 45.6 ± 11.7 (19-88) | 28 m/ 32 f |
|-------------------|---------|---|-------------------|------------|---------------------|------------|

n – number of patients

Y – yes, N – no

± standard deviation

(range)

[IQR]

m - male, f – female

N/A – not available

## Quality of studies

QUADAS-2 evaluation showed high bias within the ‘patient selection’ and ‘flow and timing’ domains. ‘Patient selection’ always resulted in high bias due all included studies being case-controlled. High bias was reported for ‘index test’ when there it was unclear whether readers were blinded to the clinical details. Since the diagnosis of an audio-vestibular symptom (reference standard) always preceded index test evaluation, all studies were low bias in this domain. Only 1/16 studies were deemed low risk with the regard to ‘flow and timing’ since others were either retrospective or included post hoc exclusions (Fig 2).

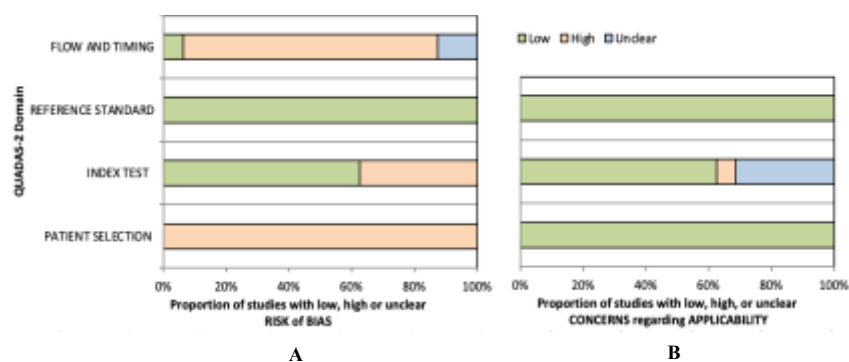

**Figure 2.** QUADAS-2 tool. Bar charts quantify studies by (a) risk of bias and (b) applicability concerns for the 16 eligible studies included in the meta-analysis.

## Relationship between audio-vestibular symptoms and an IAM vascular loop or CN VIII neurovascular contact

Pooled odds ratios are presented in Table 3. Forest plots are shown in Figure 3.

There was no significant association demonstrated between the presence of tinnitus (undefined) and that of IVL (OR 0.90 95% CI 0.47, 1.70) or CN VIII NVC (OR 1.15, CI 0.68, 1.95) ( $p>0.05$ ). The single study of the ‘typewriter tinnitus’ subtype showed no significant difference in the prevalence of symptoms in ears with IVL ( $p=0.73$ ) or NVC ( $p=0.15$ ) [7].

There was no relationship demonstrated between ears with SNHL (undefined) and the presence of IVL (OR 0.67, 95% CI 0.36, 1.25) or CN VIII NVC (OR 0.89, 95% CI 0.33, 2.40) ( $p>0.05$ ). In studies of the SoSNHL subtype alone, there was also no relationship between symptomatic ears and CN VIII NVC (OR 1.16, 95% CI 0.61, 2.20) ( $p>0.05$ ) however and there was an association with an IVL (OR 1.34, 95% CI 1.04, 1.73) ( $p=0.02$ ).

There was no significant difference in the prevalence of IVL or CN VIII NVC between ears with vertigo (undefined) and control ears (OR 0.97, 95% CI 0.64, 1.48), (OR 0.99, 95% CI 0.42, 2.32) ( $p>0.05$ ). However, there was a strong association between the presence of CN VIII NVC and the specific diagnosis of vestibular paroxysmia subtype (OR 13.19, 95% CI 2.09, 83.16) ( $p=0.006$ ). No included studies investigated the association of IVL and vestibular paroxysmia.

#### Forest plot for tinnitus (undefined) and presence of an IVL

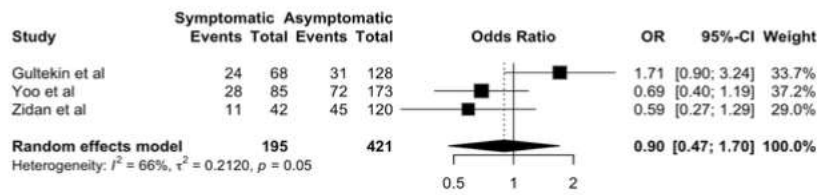

#### Forest plot for tinnitus (undefined) and CN VIII NVC

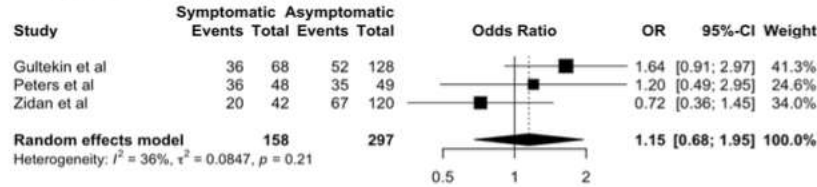

#### Forest plot for SNHL (undefined) and presence of an IVL

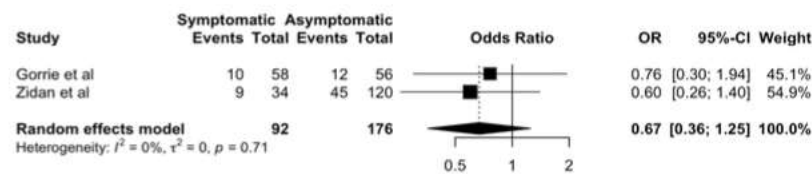

#### Forest plot for SNHL (undefined) and CN VIII NVC

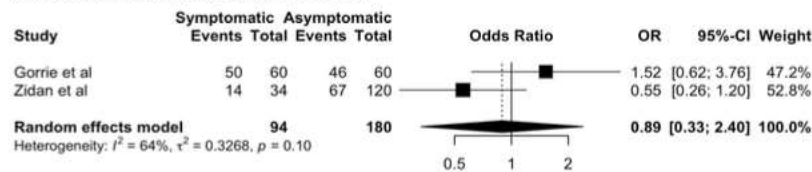

#### Forest plot for SoSNHL and presence of an IVL

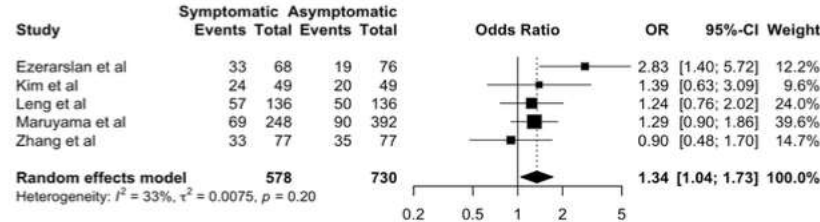

#### Forest plot for SoSNHL and CN VIII NVC

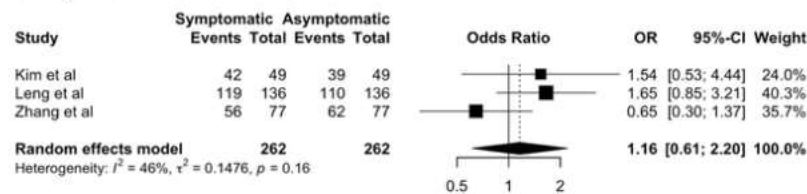



#### Forest plot for vertigo (undefined) and IVL

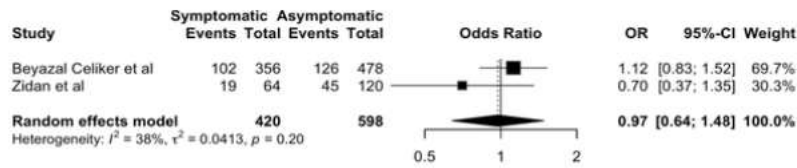

#### Forest plot for vertigo (undefined) and CN VIII NVC

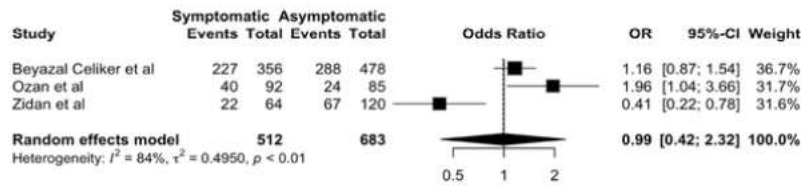

#### Forest plot for vestibular paroxysmia and CN VIII NVC

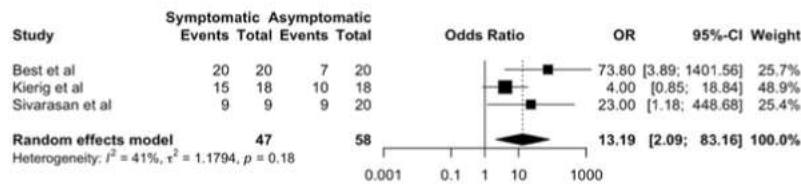

Events – presence of a vascular loop within the IAM or CN VIII contact

OR – odds ratio

CI – confidence interval

IVL – intrameatal vascular loop

NVC – neurovascular compression

Figure 3. Forest plots for each audio-vestibular symptom and corresponding MRI variable (IVL or CN VIII NVC).

**Table 3. Pooled odds ratio, 95% confidence intervals and p values for the association between IVL or CN VIII NVC and audio-vestibular symptoms.**

| Audio-vestibular symptom | MRI vascular loop variable | Number of studies | Pooled OR (95% CI)         | p            |
|--------------------------|----------------------------|-------------------|----------------------------|--------------|
| Tinnitus (undefined)     | IVL                        | 3                 | 0.90 (0.47, 1.70)          | 0.73         |
| Tinnitus (undefined)     | NVC                        | 3                 | 1.15 (0.68, 1.95)          | 0.60         |
| SNHL (undefined)         | IVL                        | 2                 | 0.67 (0.36, 1.25)          | 0.21         |
| SNHL (undefined)         | NVC                        | 2                 | 0.89 (0.33, 2.40)          | 0.82         |
| SoSNHL                   | IVL                        | 5                 | <b>1.34 (1.04, 1.73)</b>   | <b>0.02</b>  |
| SoSNHL                   | NVC                        | 3                 | 1.16 (0.61, 2.20)          | 0.65         |
| Vertigo (undefined)      | IVL                        | 2                 | 0.97 (0.64, 1.48)          | 0.90         |
| Vertigo (undefined)      | NVC                        | 3                 | 0.99 (0.42, 2.32)          | 0.98         |
| Vestibular Paroxysmia    | NVC                        | 3                 | <b>13.19 (2.09, 83.16)</b> | <b>0.006</b> |

OR – odds ratio

CI – confidence interval

IVL – position of an intrameatal vascular loop within the IAM

NVC – neurovascular compression of CN VIII

## Heterogeneity

Considerable heterogeneity was detected in one sub-group for papers comparing the presence of CN VIII NVC in patients with vertigo (undefined) ( $p < 0.01$ ), with an  $I^2$  of 84%. All other analyses demonstrated non-significant p-values (0.05-0.71).  $I^2$  quantification suggested moderate heterogeneity for five sub-group analyses, and substantial heterogeneity for a further 2 sub-analyses. The subgroup analysis comparing IVL and SNHL demonstrated  $I^2$  of 0%. A guide for the interpretation of  $I^2$  has been included in supplementary 5.

## DISCUSSION

This systematic review and meta-analysis sought to quantify the relationship between intrameatal vascular loops (IVL) or CN VIII neurovascular contact (NVC) and specific audio-vestibular symptoms. Pooled data from 16 case-controlled studies demonstrated no statistically significant association between the presence of an IVL or CN VIII NVC and either tinnitus (undefined) or SNHL (undefined), whilst there was also no relationship between IVL or vertigo (undefined) or CN VIII NVC and vertigo (undefined). However, the symptomatic subtype of sudden onset sensorineural hearing loss (SoSNHL) demonstrated a significant association with the presence of an IVL whilst that of vestibular paroxysmia was associated with CN VIII NVC (fig 3) (table 3).

Few attempts have been made to formally synthesise the body of literature before now. Chadha and Weiner performed a systematic review of five papers in 2008, but this comprised studies with heterogenous and largely non-comparable methodology [28]. Two of the eligible studies concurred with our finding of no significant association between CN VIII NVC

and unilateral tinnitus, however an association was demonstrated between CN VIII NVC and sensorineural hearing loss ( $p < 0.05$ , OR 1.99) [28]. In addition, a more recent meta-analysis found no significant association between ipsilateral SoSNHL and NVC, although substantial differences in eligibility criteria and interpretation of IVL/NVC grading exists between their work and the present study [29].

The results of the current study should serve to inform both radiology and surgical colleagues alike. Whilst dedicated three dimensional T2-weighted sequences will be required to exclude other pathologies in patients with undefined audio-vestibular symptoms, there will not be a requirement for the radiologist to report either CN VIII NVC or IVL. Similarly, our analysis indicates that IVL and CN VIII NVC are unlikely to be an aetiology for undefined SNHL, tinnitus and vertigo, and would not benefit from surgical intervention. A previous meta-analysis of 35 studies and 572 patients who underwent microvascular decompression of CN VIII NVC found that only 28% of tinnitus patients and 32% of vertigo patients reported complete relief of symptoms and with substantial complication rates following treatment [4].

The results of the current study demonstrate an association between an IVL and SoSNHL. Identifiable causes of SoSNHL are found in a minority of patients, with a vascular aetiology and altered neural perfusion in the context of an IVL a possible pathophysiological explanation [30]. However, we note that of the five papers included in the sub-analysis, only one paper demonstrated an OR greater than 1 suggesting low statistical power for this association. Moreover, there may be several confounding factors responsible for altered vascular supply to the inner ear with a recent meta-analysis demonstrating increased rates of concomitant diabetes, hypertension, and increased cholesterol in patients with SoSNHL [31].

The demonstrated association of CN VIII NVC with vestibular paroxysmia also warrants a consideration of potential pathophysiology. Whilst this study indicates an association rather than causality, it may be postulated that the association of CN VIII NVC with the characteristic short lived paroxysmal vertigo of vestibular paroxysmia is more likely to be related to direct pulsatile compression of the vulnerable long VIII transition zone resulting in ephaptic discharges [32].

Limitations of the current study should be appreciated. Firstly, a body of non-English language literature was not reviewed which may have missed some eligible or noteworthy studies. Secondly, the low number (2-5) of eligible studies for each analysis and the generally small study cohorts have the potential to increase type II error. In this regard, some substantial case-controlled studies were not considered eligible since it was not possible to identify the specific audio-vestibular symptom experienced. For instance, Makins et al studied “auditory symptoms”, and Lei et al investigated a cohort with Meniere’s Disease, neither of which showed a significant association with IVLs [33-34]. Thirdly, it should be noted that case-controlled studies analysing IVL or CN VIII NVC were not available for all relevant symptom subgroups, including that for pulsatile tinnitus. Finally, despite attempts to reduce heterogeneity in our meta-analysis and a  $p$ -values  $\geq 0.05$  in 7/8 plots, there remained a moderate-substantial degree of variance with  $I^2$  ranging from 0-84% for each sub-analysis. Reasons for this are likely multifaceted and comprise clinical heterogeneity between studies and a small number of included papers. Any future studies should aim to collect patients consecutively, with a sample size which allows for appropriate power, adopt an established grading system for vascular loops and a control group of healthy volunteers.

## CONCLUSIONS

This systematic review and meta-analysis evaluated the association between the presence of a vascular loop within the IAM (IVL) or contacting the vestibulo-cochlear nerve (CN VIII NVC) and audio-vestibular symptoms. There was no statistically significant correlation between IVL or CN VIII NVC and tinnitus, sensorineural hearing loss or vertigo with the exception of the specific subtypes of vestibular paroxysmia and sudden onset sensorineural hearing loss.

## REFERENCES

1. Kierig E, Gerb J, Boegle R, et al. Vestibular paroxysmia entails vestibular nerve function, microstructure and endolymphatic space changes linked to root-entry zone neurovascular compression. *Journal of Neurology*. 2023; 270: 82-100.
2. Applebaum EL, Valvasorri G. Internal auditory canal vascular loops: audiometric and vestibular system findings. *Am J Otol*. 1985 Nov;Suppl:110-3.
3. Haller S, Etienne L, Kövari E, et al. Imaging of neurovascular compression syndromes: trigeminal neuralgia, hemifacial spasm, vestibular paroxysmia, and glossopharyngeal neuralgia. *Am J Neuroradiol*. 2016 Aug;37(8):1384-92.
4. Van den Berg MJC, van Dijk JMC, Posthumus IA, et al. Microvascular decompression of the cochleovestibular nerve for treatment of tinnitus and vertigo: a systematic review and meta-analysis of individual patient data. *J Neurosurg*. 2017; 127(3): 588-601.
5. Moher D, Liberati A, Tetzlaff J, et al. Preferred reporting items for systematic reviews and meta-analyses: the PRISMA statement. *PLoS Medicine*. 21; 6(7): e1000097.
6. Whiting PF. QUADAS-2: a revised tool for the quality assessment of diagnostic accuracy studies. *Ann Intern Med*. 2011; 155(8): 529.
7. Bae YJ, Jeon YJ, Choi BS, et al. The role of MRI in diagnosing neurovascular compression of the cochlear nerve resulting in tinnitus. *Am J Neuroradiol*. 2017; 38(6): 1212-1217.
8. Best C, Gawehn J, Kramer HH, et al. MRI and neurophysiology in vestibular paroxysmia: contradiction and correlation. *J Neurol Neurosurg Psychiatry*. 2013; 84(12): 1349-56.
9. Beyazal Celiker F, Dursun E, Celiker M, et al. Evaluation of vascular variations at the cerebellopontine angle by 3D T2WI magnetic-resonance imaging in patients with vertigo. *J Vestib Res*. 2017; 23(2-3): 147-153.
10. Ezeraslan H, Sanhal EO, Kurukahvecioglu S, et al. Presence of vascular loops entering internal acoustic channel may increase risk of sudden sensorineural hearing loss and reduce recovery of these patients. *Laryngoscope*. 2017; 127(1): 210-215.
11. Gorrie A, Warren FM, de la Garza AN, et al. Is there a correlation between vascular loops in the cerebellopontine angle and unexplained unilateral hearing loss? *Otol Neurotol*. 2010; 31(1): 48-52.
12. Gultekin S, Celik H, Akpek S, et al. Vascular loops at the cerebellopontine angle: is there a correlation with tinnitus? *Am J Neuroradiol*. 2008; 29(9): 1746-9.
13. Kim SH, Ju YR, Choi JE, et al. Anatomical location of AICA loop in CPA as a prognostic factor of ISSNHL. *PeerJ*. 2019; 11(7): e6582.
14. Leng Y, Lei P, Liu Y, et al. Vascular loops in cerebellopontine angle in patients with unilateral idiopathic sudden sensorineural hearing loss: evaluations by three radiological grading systems. *Laryngoscope Investig Otolaryngol*. 2022; 7(5): 1532-1540.
15. Maruyama A, Kawashima Y, Fujikawa T, et al. Potential confounding factors may influence the association between configurations of the vertebrobasilar system and the incidence of idiopathic sudden sensorineural hearing loss and canal paresis. *Otology & Neurotology*. 2020; 41(5): e548-555.
16. Ozan E, Arslan H. Neurovascular compression of the vestibulocochlear nerve using temporal MRI in geriatric patients with vertigo. *Turkish Journal of Geriatrics*. 2017; 20(3): 164-171.
17. Peters T, van den Berge M, Free R, et al. The relation between tinnitus and a neurovascular conflict of the cochleovestibular nerve on magnetic resonance imaging. *Otology & Neurotology*. 2020; 41(1): e124-131.
18. Sivarasan N, Touska P, Murdin L et al. MRI findings in vestibular paroxysmia – an observational study. *J Vestib Res*. 2019; 29(2-3): 173-145.
19. Yoo HS, Lee DW, Min HJ, et al. The association of anterior inferior cerebellar artery in internal auditory canal with tinnitus and hearing loss. *Korean Journal of Audiology*. 2011; 15(2): 67-71.
20. Zhang G, Hongbin L, Zhao Z, et al. Location of the AICA influences the severity but not occurrence of ISSNHL: a reappraisal using high-resolution 3T MRI. *J Otol*. 2023; 18(4): 193-198.
21. Zidan MA, Almansor N. Presence of vascular loop in patients with audio-vestibular symptoms: is it a significant finding? Evaluation with 3-tesla MRI 3D constructive interference steady state (CISS) sequence. *Egyptian Journal of Radiology and Nuclear Medicine*. 2020; 51: 114.
22. McDermott AL, Dutt SN, Irving RM, et al. Anterior inferior cerebellar artery syndrome: fact or fiction. *Clin Otolaryngol Allied Sci*. 2003; 28(2): 75-80.
23. Sirikci A, Bayazit Y, Ozer E, et al. Magnetic resonance imaging-based classification of anatomic relationship between the cochleovestibular nerve and anterior inferior cerebellar artery in patients with non-specific neuro-otologic symptoms. *Surg Radiol Anat*. 2005; 27(6): 531-5.
24. Stachler RJ, Chandrasekhar SS, Archer SM, et al. American Academy of Otolaryngology – Head and Neck Surgery. Clinical practice guideline: sudden hearing loss. *Otolaryngol Head Neck Surg*. 2012; 146: 1-35.
25. Strupp M, Lopez-Escamez JA, Kim JS, et al. Vestibular paroxysmia: diagnostic criteria. *J Vestib Res*. 2016; 26(5-6): 409-415.
26. Editorial Board of Chinese Journal of Otorhinolaryngology Head and Neck Surgery. Guidelines of diagnosis and treatment of sudden deafness 2015. *Zhonghua Er Bi Yan Hou Tou Jing Wai Ke Za Zhi*. 2015; 50(6): 443-7.
27. Kazawa N, Togashi K, Ito J. The anatomical classification of AICA/PICA branching and configurations in the cerebellopontine angle area on 3D-drive thin slice T2WI MRI. *Clinical Imaging*. 2013; 37(5): 865-870.
28. Chadha NK, Weiner GM. Vascular loops causing otological symptoms: a systematic review and meta-analysis. *Clin Otolaryngol*. 2008; 33: 5-11.
29. Yamin T, Oron Y, Handzel O, et al. Neurovascular conflict and sudden unilateral sensorineural hearing loss: coincidence or coexistence? *European Archives of Oto-Rhino-Laryngology*. 2023; 280: 3635-3641.

30. Chau JK, Lin JR, Atashband S, Irvine RA, Westerberg BD. Systematic review of the evidence for the etiology of adult sudden sensorineural hearing loss. *The Laryngoscope*. 2010 May;120(5):1011-21.
31. Saba ES, Swisher AR, Ansari GN, et al. Cardiovascular risk factors in patients with sudden sensorineural hearing loss: a systematic review and meta-analysis. *Otolaryngol Head Neck Surg*. 2023; 168(5): 907-921.
32. Brandt T, Strupp M, Dieterich M. Vestibular paroxysmia: a treatable neurovascular cross-compression syndrome. *J Neurol*. 2016 Apr;263 Suppl 1:S90-6.
33. Makins AE, Nikolopoulos TP, Ludman C, et al. Is there a correlation between vascular loops and unilateral auditory symptoms? *Laryngoscope*. 1998; 108: 1739-1742.
34. Lei P, Xia K, Li J, et al. Radiological presence of vascular loops in the cerebellopontine angle region in patients with unilateral Meniere's disease. *Eur Arch Otorhinolaryngol*. 2023; 280(7): 3195-3201.

## SUPPLEMENTAL FILES

### Online Supplemental Data. Study characteristics.

| Author (year)              | Study Design | Case symptom          | Definition                                                                                                                                                                                                          | Control type      | Intrameatal vascular loop or CN VIII NVC | Vascular loop/NVC Classification (s)<br>[11][22][23][27] |
|----------------------------|--------------|-----------------------|---------------------------------------------------------------------------------------------------------------------------------------------------------------------------------------------------------------------|-------------------|------------------------------------------|----------------------------------------------------------|
| Bae (2017) [7]             | R/C          | Typewriter tinnitus   | “typewriter,” “machine gun,” or “crackling” sounds.                                                                                                                                                                 | Contralateral ear | IVL, NVC                                 | Chavda                                                   |
| Best (2013) [8]            | U/U          | Vestibular paroxysmia | ‘Definite’ VP patients included                                                                                                                                                                                     | Other Subject*    | NVC                                      | N/A                                                      |
| Beyazal Celiker (2017) [9] | R/U          | Vertigo               | Patients admitted with dizziness, BPPV excluded                                                                                                                                                                     | Unspecified       | IVL, NVC                                 | Chavda                                                   |
| Ezerarslan (2019) [10]     | R/U          | SoSNHL                | As per American Society of Otolaryngology [24].                                                                                                                                                                     | Other Subject     | IVL                                      | Kazawa                                                   |
| Gorrie (2009) [11]         | R/C          | SNHL                  | <p>i) the difference between the pure-tone audiometry average of the symptomatic ear when compared with the asymptomatic ear &gt;70%.</p> <p>ii) the difference between the pure-tone audiometry average of the</p> | Contralateral ear | IVL, NVC                                 | Chavda                                                   |

|                      |     |                       |                                                                                                  |                                    |          |                        |
|----------------------|-----|-----------------------|--------------------------------------------------------------------------------------------------|------------------------------------|----------|------------------------|
|                      |     |                       | symptomatic ear and the asymptomatic ear > 20 dB.                                                |                                    |          |                        |
| Gultekin (2008) [12] | P/U | Tinnitus              | ‘Unexplained’ tinnitus<br><br>Pulsatile/non-pulsatile not specified                              | Other subject, Contralateral ear   | IVL, NVC | Chavda                 |
| Kierig (2023) [1]    | P/U | Vestibular paroxysmia | Diagnosis of VP was based on the<br><br>Classification Committee of the Bárány Society 2016 [25] | Other subject                      | NVC      | N/A                    |
| Kim (2019) [13]      | R/C | SoSNHL                | As per American Society of Otolaryngology [24].                                                  | Contralateral ear                  | IVL, NVC | Chavda, Gorrie         |
| Leng (2022) [14]     | R/U | SoSNHL                | As per American Society of Otolaryngology [24].                                                  | Contralateral ear                  | IVL, NVC | Chavda, Gorrie, Kazawa |
| Maruyama (2020) [15] | R/C | SoSNHL                | As per American Society of Otolaryngology [24].                                                  | Other subject**, Contralateral ear | IVL      | Kazawa                 |
| Ozan (2017) [16]     | R/U | Vertigo               | Short duration episodic<br><br>peripheral vertigo                                                | Other subject                      | NVC      | N/A                    |
| Peters (2020) [17]   | R/C | Tinnitus              | Non-pulsatile tinnitus (83%) or<br><br>Pulsatile tinnitus (17%)                                  | Contralateral ear                  | NVC      | Sirikci                |
| Sivaran (2019) [18]  | R/C | Vestibular paroxysmia | All cases of ‘probable’ or                                                                       | Other subject                      | NVC      | N/A                    |

|                   |     |                         |                                                                            |                                     |          |                |
|-------------------|-----|-------------------------|----------------------------------------------------------------------------|-------------------------------------|----------|----------------|
|                   |     |                         | ‘definite’ VP included [25]                                                |                                     |          |                |
| Yoo (2011) [19]   | R/U | Tinnitus                | ‘Unexplained’ tinnitus<br><br>Pulsatile/non-pulsatile not<br><br>specified | Other subject***, Contralateral ear | IVL      | Chavda         |
| Zhang (2023) [20] | U/U | SoSNHL                  | As per Chinese guidelines 2015<br><br>[26]                                 | Contralateral ear                   | IVL, NVC | Chavda, Gorrie |
| Zidan (2020) [21] | R/U | Tinnitus, SNHL, Vertigo | Undefined<br><br>Pulsatile/non-pulsatile not<br><br>specified              | Other subject                       | IVL, NVC | Chavda         |

P – prospective, R – retrospective, U – unclear / C – consecutive sampling, U – unclear

SoSNHL – sudden onset sensorineural hearing loss

SNHL – sensorineural hearing loss

IVL – position of an intrameatal vascular loop within the IAM

NVC – neurovascular compression of CN VIII

American Society of Otolaryngology definition of SoSNHL - hearing loss of  $\geq 30$  dB affected at least three consecutive frequencies within a 72-hour period.

\*Subjects with trigeminal neuralgia

\*\* Contralateral ears of patients with bell’s palsy

\*\*\* Subjects with headache



## **Supplementary 1. Search strategy**

### Database search terms

Key words (Thesaurus/index and MESH terms) and free text search terms were adapted for each database search.

### **EMBASE**

#1 exp artery/

#2 exp anterior inferior cerebellar artery/

#3 exp nerve compression/

#4 vascular.mp.

#5 vascular loop.mp.

#6 arterial loop.mp.

#7 AICA.mp.

#8 neurovascular compress\*.mp.

#9 exp nuclear magnetic resonance imaging/

#10 magnetic resonance imag\*

#11 MRI

#12 exp vestibulocochlear nerve/

#13 exp vestibular nerve/

#14 exp cochlear nerve/

#15 exp internal auditory canal/

#16 exp pons angle/

#17 exp inner ear/

#18 IAM.mp.

#19 IAC.mp.

#20 CPA.mp.

#21 vestibul\*.mp.

#22 cochle\*.mp.

#23 exp vestibular disorder/

#24 exp hearing impairment/

#25 exp tinnitus/

#26 otologic\*.mp.

#27 audio\*.mp.

#28 dizz\*.mp.

#29 vert\*.mp.

#30 hear\*.mp.

#31 deaf\*.mp.

#32 #1 OR #2 OR #3 OR #4 OR #5 OR #6 OR #7 OR #8

#33 #9 OR #10 OR #11

#34 #12 OR #13 OR #14 OR #15 OR #16 OR #17 OR #18 OR #19 OR #20 OR #21 OR #22

#35 #23 OR #24 OR #25 OR #26 OR #27 OR #28 OR #29 OR #30 OR #31

#36 #32 AND #33 AND #34 AND #35

## **MEDLINE**

#1 artery.mp.

#2 vascular.mp.

#3 vascular loop.mp.

#4 arterial loop.mp.

#5 anterior inferior cerebellar artery.mp.

#6 AICA.mp.

#7 nerve compress\*.mp.

#8 neurovascular compress\*.mp.

#9 exp magnetic resonance imaging/

#10 magnetic resonance imag\*.mp.

#11 MRI.mp.

#12 exp vestibulocochlear nerve/

#13 exp vestibular nerve/

#14 exp cochlear nerve/

#15 exp cerebellopontine angle/

#16 exp ear, inner

#17 internal auditory canal.mp.

#18 internal acoustic meat\*.mp.

#19 internal auditory meatus.mp

#20 CPA.mp.

#21 IAC.mp.

#22 IAM.mp.

#23 vestibul\*.mp.

#24 cochle\*.mp.

#25 exp vestibular diseases/

#26 exp hearing loss/

#27 exp tinnitus/

#28 exp vertigo/

#29 otologic\*.mp.

#30 audio\*.mp.

#31 dizz\*.mp.

#32 hear\*.mp.

#33 deaf\*.mp.

#34 #1 OR #2 OR #3 OR #4 OR #5 OR #6 OR #7 #8

#35 #9 OR #10 OR #11

#36 #13 OR #14 OR #15 OR #16 OR #17 OR #18 OR #19 OR #20 OR #21 OR #22 OR #23 OR #24

#37 #25 OR #26 OR #27 OR #28 OR #29 OR #30 OR #31 OR #32 OR #33  
#38 #34 AND #35 AND #36 AND #37

### **Scopus and Web of Science**

#1 artery  
#2 vascular  
#3 vascular loop  
#4 arterial loop  
#5 anterior inferior cerebellar artery  
#6 AICA  
#7 nerve compress\*  
#8 neurovascular compress\*  
#9 MR imag\*  
#10 MRI  
#11 magnetic resonance imag\*  
#12 cerebellopontine angle  
#13 inner ear  
#14 internal auditory\*  
#15 internal acoustic\*  
#16 CPA  
#17 IAM  
#18 IAC  
#19 vestibul\*  
#20 cochle\*  
#21 tinnitus  
#22 vert\*  
#23 otologic\*  
#24 audio\*  
#25 dizz\*  
#26 hear\*  
#27 deaf\*  
#28 SNHL  
#29 ear\*  
#30 balance  
#31 #1 OR #2 OR #3 OR #4 OR #5 OR #6 OR #7 OR #8  
#32 #9 OR #10 OR #11  
#33 #12 OR #13 OR #14 OR #15 OR #16 OR #17 OR #18 OR #19 OR #20  
#34 #21 OR #22 OR #23 OR #24 OR #25 OR #26 OR #27 OR #28 OR #29 OR #30  
#35 #31 AND #32 AND #33 AND #34

## **Cochrane Register of Controlled Trials databases**

#1 MeSH descriptor: [Arteries] explode all trees

#2 vascular

#3 vascular loop

#4 arterial loop

#5 anterior inferior cerebellar artery

#6 AICA

#7 neurovascular compress\*

#8 nerve compress\*

#9 #1 OR #2 OR #3 OR #4 OR #5 OR #6 OR #7 OR #8

#10 MeSH descriptor: [Magnetic Resonance Imaging] explode all trees

#11 MRI

#12 MR

#13 magnetic resonance imag\*

#14 #10 OR #11 OR #12 OR #13

#15 MeSH descriptor: [Vestibulocochlear Nerve] explode all trees

#16 MeSH descriptor: [Vestibular Nerve] explode all trees

#17 MeSH descriptor: [Cochlear Nerve] explode all trees

#18 MeSH descriptor: [Cerebellopontine Angle] explode all trees

#19 MeSH descriptor: [Ear, Inner] explode all trees

#20 internal auditory canal

#21 internal auditory meatus

#22 internal acoustic meat\*

#23 CPA

#24 IAC

#25 IAM

#26 vestibul\*

#27 cochle\*

#28 #15 OR #16 OR #17 OR #18 OR #19 OR #20 OR #21 OR #22 OR #23 OR #24 OR #25 OR #26 OR #27

#29 MeSH descriptor: [Vestibular Diseases] explode all trees

#30 MeSH descriptor: [Hearing Loss] explode all trees

#31 MeSH descriptor: [Tinnitus] explode all trees

#32 MeSH descriptor: [Vertigo] explode all trees

#33 otologic\*

#34 audio\*

#35 dizz\*

#36 hear\*

#37 deaf\*

#38 #29 OR #30 OR #31 OR #32 OR #33 OR #34 OR #35 OR #36 OR #37

#39 #9 AND #14 AND #28 AND #38

**Hand Searched Journals**

1. World Neurosurgery
2. Otology and Neurotology
3. Journal of The Neurological Sciences
4. Journal of Neurosurgery
5. Laryngoscope

## Supplementary 2. Principle reasons for exclusions of database and register reports after full text review for eligibility.

A No data from appropriate control group

B No data from appropriately defined case/symptomatic group

C Analysis of post-surgical patients with confirmed vascular loops

D Conference abstract without enough data

E Unable to distinguish vascular loop from alternative pathology

F Only one patient in an appropriate case or control group

G Inclusion criteria included an MRI confirmed vascular loop, rather than symptomatology alone

H Unavailable conference abstracts

I Unable to accurately extract raw data from manuscript into 2x2 table

1. Ödkvist LM, Thomas K, Niklasson M. Macrovascular causes underlying otoneurological disturbances. *Acta Otolaryngol.* 1994; 115: 145-148. **A**
2. Alekseeva NS, Krotchenkova MV, Baev AA, et al. Importance of neuroimaging and clinical neurophysiological methods in diagnosis and treatment of vestibulocochlear syndrome. *Neuroradiology.* 2014; 56 (Suppl. 1): 397-398. **D**
3. Aquinaga PY, Staverengo JP, Busato C, et al. Study of electrophysiological findings in VEMP in patients with vestibular paroxysmia. *International Archives of Otolaryngology.* 2017; 21(Suppl. 2): S3. **H**
4. Balik AO, Nacar Dogan S. The role of fiesta sequence in investigation of vascular compression of cochlear nerve and distortions. *Neuroradiology.* 2019; 61(Suppl 1): S1-S137 **D**
5. Birsel SA, Suat F, Emre O. MRI findings of AICA loops in children: incidence and association with audiovestibular symptoms. *Pediatric Radiology.* 2021; 51(Suppl. 1): S1-S259 **D**
6. Brackmann DE, Kesser BW, Diaz Day J. Microvascular decompression of the vestibulocochlear nerve for disabling positional vertigo: the house ear clinic experience. *Otology & Neurontology.* 2001; 22: 882-887. **C**
7. Brookes GB. Vascular decompression surgery for severe tinnitus. *Am J Otolaryngol.* 1996; 17: 569-576. **C**
8. Cadoni G, Agostino S, Scipione S, et al. Sudden sensorineural hearing loss: our experience in diagnosis, treatment, and outcome. *Journal of Otolaryngology.* 2005; 34(6): 395-401. **A**
9. Casselman JW, Kuhweide R, Dehaene I, et al. Magnetic resonance examination of the inner ear and cerebellopontine angle in patients with vertigo and/or abnormal findings at vestibular testing. *Acta Oto-Laryngologica.* 2009; 114 (sup 513): 15-27. **A**
10. Chang WS, Kim BS, Lee JE, et al. Is tinnitus accompanied by hemifacial spasm in normal hearing patients also a type of hyperactive neurovascular compression syndrome? a magnetoencephalography study. *BMC Neurology.* 2013; 13:42. **B**
11. Cho YH, Lee SH, P CW, et al. The association of anterior inferior cerebellar artery in IAC with tinnitus and hearing loss. *Otolaryngology – Head and Neck Surgery.* 2012; 147(2S). **D**
12. Cicek E. The analysis of the relationship between subjective tinnitus and vascular loop, and age and distribution: an MRI study. *EJMO.* 2018; 2(4): 231-237. **A**
13. Clift JM, Wong RD, Carney GM, et al. Radiographic analysis of cochlear nerve vascular compression. *Annals of Otolaryngology, Rhinology & Laryngology.* 2009; 118(5): 356-361. **G**
14. Clyde JW, Patel VA, Kanekar S, et al. Magnetic resonance imaging findings in idiopathic sudden sensorineural hearing loss. *Acta Radiologica.* 2019; 60(9): 1167-1174. **E**
15. de Abreu Junior L, Kuniyoshi CH, Wolosker AB, et al. Vascular loops in the anterior inferior cerebellar artery, as identified by magnetic resonance imaging, and their relationship with otologic symptoms. *Radiol Bras.* 2016; 49(5): 300-304. **A**
16. D'Adensky C, Duterme JP, Tainmont S, et al. From pulsatile tinnitus to diagnosis: a retrospective study of 53 patients and review of the literature. *B-ENT.* 2013; Suppl 20: 39. **H**
17. De Carpentier J, Lynch N, Fisher A, et al. MR imaged neurovascular relationships at the cerebellopontine angle. *Clin Otolaryngol.* 1996; 21: 312-316. **I**
18. De Ridder D, De Ridder L, Nowe V, et al. Pulsatile tinnitus and the intrameatal vascular loop: why do we not hear our carotids? *Neurosurgery.* 2005; 57: 1213-1217. **A**
19. Di Stadio A, Dipietro L, Ralli M, et al. Loop characteristics and audio-vestibular symptoms or hemifacial spasm: is there a correlation? A multiplanar MRI study. **B**
20. Dubey TN, Nahar N, Thomas A. Study of magnetic resonance angiography in cases of central vertigo and its clinical correlation. *Journal of Neurological Sciences.* 2015; 357: e172-e192. **D**
21. Elaini S, Magnan J, Deveze A, et al. Magnetic resonance imaging criteria in vascular compression syndrome. *The Egyptian Journal of Otolaryngology.* 2013; 29:10-15. **C**
22. Ensari N, Gür Ö, Selcuk Ö, et al. Is presence of vascular loop in magnetic resonance imaging always related to tinnitus? *The Journal of Craniofacial Surgery.* 2017; 28(3): 295-296. **A**
23. Erdogan N, Altay C, Akay E, et al. MRI assessment of internal acoustic canal variations using 3D-FIESTA sequences. *Eur Arch Otorhinolaryngol.* 2013; 270: 469-475. **A**
24. Furuya Y, Ryu H, Uemura K, et al. MRI of intracranial neurovascular compression. *Journal of Computer Assisted Tomography.* 1992; 16(4): 503-505. **A**
25. Girard N, Poncet M, Chays A, et al. Neurovascular compression in the CP angle. *Rivista di Neuroradiologia.* 1995; 8: 981-989. **B**
26. Hermann M, Sloniewski P, Zielinski P. An attempt at objective evaluation of neurovascular compression with the use of magnetic resonance imaging. *Med Sci Monit.* 1998; 4(3): 532-537. **A**
27. Herzog JA, Bailey S, Meyer J. Vascular loops of the internal auditory canal: a diagnostic dilemma. *Am J Otolaryngol.* 1997; 18:26-31. **A**

28. Hoekstra CEL, Pijris VF, van Zanten GA. Diagnostic yield of a routine magnetic resonance imaging in tinnitus and clinical relevance of anterior inferior cerebellar artery loops. *Otology & Neurotology*. 2015; 36: 359-365. **A**
29. Htun HM, MUI SL, Williams C, et al. Incidental findings on magnetic resonance imaging of the internal auditory meatus performed to investigate audio vestibular symptoms. *Journal of Laryngology and Otology*. 2017; 131 (1): 32-36. **A**
30. Hsu T. Tinnitus: differential diagnosis on imaging evaluation. *Neuroradiology*. 2018; 60(Suppl. 1): 298-299. **D**
31. Ibis T, Gawehn J, Thomke F, et al. Value of structural MRI and neurophysiology in the diagnosis of vestibular paroxysmia. *Journal of Neurology*. 2014; 261. **D**
32. Kalsotra P, Gupta R, Gupta N, et al. Incidental findings on magnetic resonance imaging in patients with tinnitus. *Indian Journal of Otology*. 2015; 21(1): 41-46. **A**
33. Kazawa N, Togashi K, Ito J. The anatomical classification of AICA/PICA branching and configurations in the cerebellopontine angle area on 3D-drive thin slice T2WI MRI. *Clinical Imaging*. 2013; 37: 865-870. **A**
34. Ko Y, Park CW. Microvascular compression for Tinnitus. *Stereotactic and Functional Neurosurgery*. 1997; 68: 266-269. **C**
35. Li L, Amiraragi N, Begbie F, et al. The significance of vascular loops in the internal auditory meatus: a true incidental imaging finding? *European Archives of Oto-Rhino-Laryngology*. 2019; 276:3275-3280. **G**
36. Lei P, Xia K, Li J, et al. Radiological presence of vascular loops in the cerebellopontine angle region in patients with unilateral Meniere's disease. *Eur Arch Otorhinolaryngol*. 2023; 280(7): 3195-3201. **B**
37. Loader B, Linauer I, Korkesch S, et al. A connection between neurovascular conflicts within the cerebellopontine angle and vestibular neuritis, a case-controlled cohort study. *Acta Otorhinolaryngologica Italica*. 2016; 36:421-427. **A**
38. Mahrous AK, Kalepu R. Positive findings on MRI in patients with asymmetrical SNHL. *Eur Arch Otorhinolaryngol*. 2008; 265: 1471-1475. **A**
39. Makins AE, Nikolopoulos TP, Ludman C, et al. Is there a correlation between vascular loops and unilateral auditory symptoms? *The Laryngoscope*. 1998; 108: 1739-1742. **B**
40. Markowski J, Gierak T, Kluczevska E, et al. Assessment of vestibulocochlear organ function in patients meeting radiologic criteria of vascular compression syndrome of vestibulocochlear nerve – diagnosis of disabling positional vertigo. *Med Sci Monit*. 2011; 17(3):169-172. **G**
41. Maryenko I, Antonenco A, Naumenko D, et al. Neuroimaging characteristics of the recurrent vestibular dysfunction. *European Journal of Neurology*. 2015; 22(Suppl. 1): 484-828. **D**
42. McDermott AL, Dutt SN, Irving RM, et al. Anterior inferior cerebellar artery syndrome: fact or fiction. *Clin Otolaryngol*. 2003; 28:75-80. **A**
43. Mejia-Quinones V, Valderrama-Chaparro JA, Paredes-Padilla S, et al. Vascular loop in the cerebellopontine angle: clinical-radiological correlation. *Radiologia*. 2022; 64: 407-414. **G**
44. Mirza S, Malik TH, Ahmed A, et al. Incidental findings on magnetic resonance imaging screening for cerebellopontine angle tumours. *The Journal of Laryngology & Otology*. 2000; 114: 750-754. **B**
45. Nowe V, De Ridder D, Van de Heyning PH, et al. Does the location of a vascular loop in the cerebellopontine angle explain pulsatile and non-pulsatile tinnitus? *Eur Radiol*. 2004; 14: 2282-2289. **A**
46. Nowe V, Van de Heyning P, Parizel PM. MRI in patients with otovestibular complaints of unknown origin. *B-ENT*. 2007; 3(7): 27-35. **B**
47. Parnes LS, Shimotakahara SG, Pelz D, et al. Vascular relationships of the vestibulocochlear nerve on magnetic resonance imaging. *The American Journal of Otology*. 1990; 11(4): 278-281. **B**
48. Pilch J, Likus W, Markowski J, et al. Vestibular organ function in patients with recognised radiological criteria of vascular compression syndrome (VCS) of vestibulocochlear nerve – disabling positional vertigo (DPV). *Fluid Barriers CNS*. 2019; 16(Suppl 1): A163. **D**
49. Ryu H, Yamamoto S. Neurovascular decompression of the eighth cranial nerve for intractable vertigo and tinnitus. *Operative Techniques in Neurosurgery*. 2001; 4(3): 142-152. **C**
50. Schwaber MK, Hall JW. Cochleovestibular nerve compression syndrome: clinical features and audiovestibular findings. *Laryngoscope*. 1992; 102: 1020-1029. **A**
51. Serra A, Chiaramonte R, Viglianesi A, et al. MRI aspects of neuro-vascular conflict of the VIII nerve. *The Neuroradiology Journal*. 2010; 23:700-703. **G**
52. Sirikci A, Bayazit Y, Ozer E, et al. Magnetic resonance imaging-based classification of anatomic relationship between the cochleovestibular nerve and anterior inferior cerebellar artery in patients with non-specific neuro-otologic symptoms. *Surg Radiol Anat*. 2005; 27: 531-535. **A**
53. Sun H, Tian X, Zhao Y, et al. Application of ABR in pathogenic neurovascular compression of the 8<sup>th</sup> cranial nerve in vestibular paroxysmia. *Acta Neurochirurgica*. 2022; 164:2953-2962. **G**
54. Tanrikulu L, Scholz T, Nikoubashman O, et al. Preoperative MRI in neurovascular compression syndromes and its role for microsurgical considerations. *Clinical Neurology and Neurosurgery*. 2015; 129: 17-20. **F**
55. Teh CSL, Noordiana SH, Shamini S, et al. Vascular loops: the innocent bystander for vestibular paroxysmia. *Annals of Otology, Rhinology & Laryngology*. 2022; 131(6): 604-608. **G**
56. Tekin Z, AICA loops with tinnitus: a temporal MRI study. *Neuroradiology*. 2019; 61: 229-239. **D**
57. Tuna Yalcinozan E, Kucukciloglu Y. Can anatomical variations of the AICA loop be a cause of hearing loss which can affect the laterality of tinnitus also? *Bezmialem Science*. 2022; 10(5):596-601. **G**
58. Saraf A, Gupta N, Manhas M, et al. Anterior inferior cerebellar artery loop and tinnitus – is there any association between them? *The Egyptian Journal of Otolaryngology*. 2022; 38:171. **A**
59. Shamas IU, Waqay F, Islam MU, et al. The study of the spectrum of vertigo with special reference to vertigo of vascular origin. *Bangladesh Journal of Medical Science*. 2013; 12(2): 192-198. **A**
60. Ungar OJ, Brenner-Ullman A, Cavel O, et al. The association between auditory nerve neurovascular conflict and sudden unilateral sensorineural hearing loss. *Laryngoscope Investigative Otolaryngology*. 2018; 3: 384-387. **A**
61. Van der Steenstraten F, de Ru A, Witkamp TD. Is microvascular compression of the vestibulocochlear nerve a cause of unilateral hearing loss? *Annals of Otology, Rhinology & Laryngology*. 2007; 116(4):248-252. **A**

62. Yadav P, Jantre M, Thakkar D. Magnetic resonance imaging of cerebellopontine angle lesions. Med J DY Patil Univ. 2015; 8: 751-9. **B**



**Supplementary 3. Classification systems for vascular loop assessment.**

**IVL**

**Chavda**

I - AICA loop located at the CPA but not entering the IAM

II - AICA loop located within the proximal 50% of the IAM

III - AICA loop located extending within the distal 50% of the IAM

Grade II or III – taken as positive for an IVL

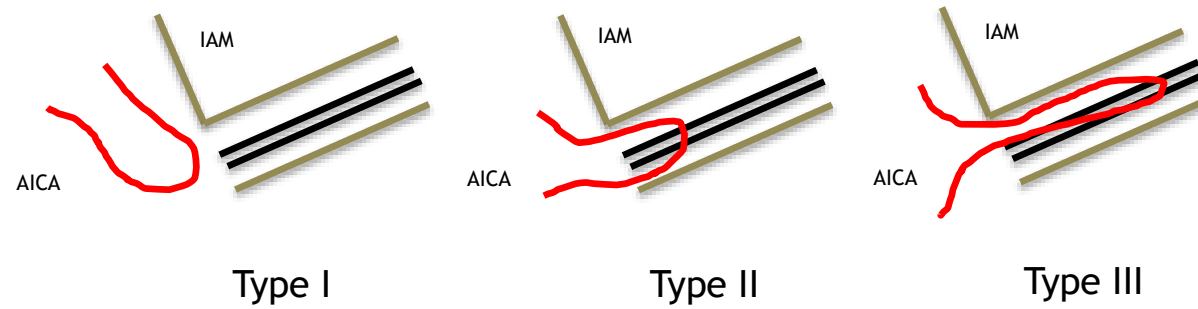

Kazawa

IA – non loop AICA/PICA located in the CPA cistern

IB – non loop AICA/PICA entering the IAM

IIA – loop type AICA/PICA located in the CPA cistern

IIB – loop type AICA/PICA entering the IAM

IB and IIB taken as positive for an IVL and IA and IIA taken negative for an IVL

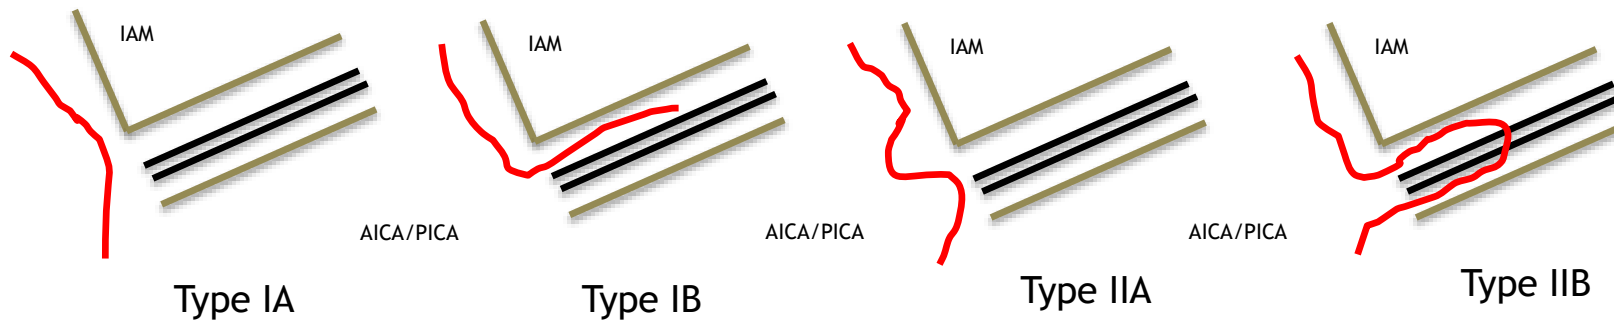

### CN VIII NVC

Gorrie

A – an AICA loop without contact with adjacent nerves

B – an AICA loop that runs adjacent to the nerves

C – an AICA loop that courses between VII and VIII cranial nerves

D – an AICA loop that displaces the VIII cranial nerve

B, C or D interpreted as positive for CN VIII NVC, A taken as negative.

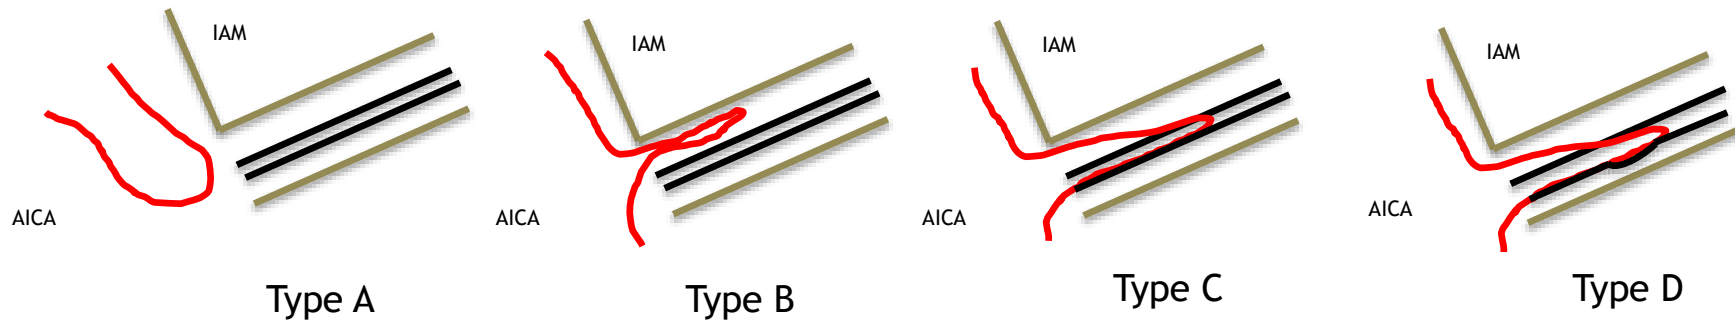

Sirikci

- 1 – Point compression – the AICA compresses only a limited portion of the cochleovestibular nerve
  - 2 – Longitudinal compression - the AICA approaches the CVN as both traverse parallel to each other
  - 3 - Loop compression - vascular loop of the AICA encircles the cochleovestibular nerve
  - 4 – Indentation - the AICA compresses the CVN so as to make an indentation in the nerve
- All grades (1-4) taken as positive for CN VIII NVC.

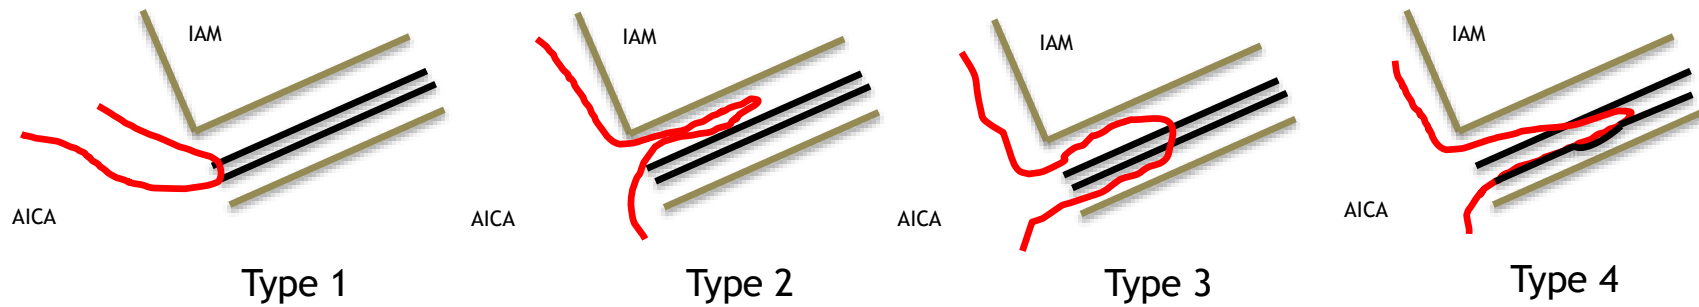

**Supplementary 4. QUADAS-2 signalling questions.**

|                                                                                                                                                                                                                                                                                                        |
|--------------------------------------------------------------------------------------------------------------------------------------------------------------------------------------------------------------------------------------------------------------------------------------------------------|
| <b>Patient selection</b>                                                                                                                                                                                                                                                                               |
|                                                                                                                                                                                                                                                                                                        |
| <i>Risk of bias</i>                                                                                                                                                                                                                                                                                    |
| Could the selection of patients have introduced bias? (Low/High/Unclear risk)                                                                                                                                                                                                                          |
| <ul style="list-style-type: none"> <li>Was a consecutive or random sample enrolled?</li> <li>Was a case-control methodology avoided?</li> <li>Did the study avoid inappropriate exclusions?</li> </ul>                                                                                                 |
|                                                                                                                                                                                                                                                                                                        |
| Notes:                                                                                                                                                                                                                                                                                                 |
| All included studies are case-control and therefore all included studies are high risk                                                                                                                                                                                                                 |
|                                                                                                                                                                                                                                                                                                        |
| <i>Concerns regarding applicability</i>                                                                                                                                                                                                                                                                |
| Are there concerns that the included patients and setting do not match the review question? (Low/High/Unclear risk)                                                                                                                                                                                    |
|                                                                                                                                                                                                                                                                                                        |
| Notes:                                                                                                                                                                                                                                                                                                 |
| Studies were considered low risk if there was a clear inclusion and exclusion criteria which was deemed to suitably match the review question.                                                                                                                                                         |
|                                                                                                                                                                                                                                                                                                        |
| <b>Conduct and interpretation of index test</b>                                                                                                                                                                                                                                                        |
|                                                                                                                                                                                                                                                                                                        |
| <i>Risk of bias</i>                                                                                                                                                                                                                                                                                    |
| Could the conduct or interpretation of the index test introduce bias? (Low/High/Unclear)                                                                                                                                                                                                               |
| <ul style="list-style-type: none"> <li>Were the index test results interpreted without knowledge of the results of the reference standard?</li> <li>If a threshold was used, was it pre-specified?</li> <li>Were two or more independent reviewers involved in interpreting the index test?</li> </ul> |
| Notes:                                                                                                                                                                                                                                                                                                 |
| Studies were considered low risk if the reader/readers of the index test were blinded to the clinical details of the patient.                                                                                                                                                                          |
|                                                                                                                                                                                                                                                                                                        |
| <i>Concerns regarding applicability</i>                                                                                                                                                                                                                                                                |
| Are there concerns that the index test or its conduct or interpretation differs from the review question? (Low/High/Unclear risk)                                                                                                                                                                      |
|                                                                                                                                                                                                                                                                                                        |
| Notes:                                                                                                                                                                                                                                                                                                 |
| Studies were considered low risk if they included thin ( $\leq 1$ mm) T2/CISS/FIESTA slices in the MRI protocol.                                                                                                                                                                                       |
|                                                                                                                                                                                                                                                                                                        |
| <b>Reference standard conduct and interpretation</b>                                                                                                                                                                                                                                                   |
|                                                                                                                                                                                                                                                                                                        |
| <i>Risk of bias</i>                                                                                                                                                                                                                                                                                    |
| Could the reference standard or its conduct or interpretation have introduced bias? (Low/High/Unclear risk)                                                                                                                                                                                            |

|                                                                                                                                                                                                                                                                                                                                                                                   |
|-----------------------------------------------------------------------------------------------------------------------------------------------------------------------------------------------------------------------------------------------------------------------------------------------------------------------------------------------------------------------------------|
| <ul style="list-style-type: none"> <li>• Are the reference standard's likely to correctly classify the target condition?</li> </ul>                                                                                                                                                                                                                                               |
| <ul style="list-style-type: none"> <li>• Was the reference standard's result interpreted without knowledge of the index test?</li> </ul>                                                                                                                                                                                                                                          |
| Notes:                                                                                                                                                                                                                                                                                                                                                                            |
| Application of the reference standard (diagnosis or acknowledgement of an audiovestibular symptom always preceded the index test (MRI) in the included studies. Therefore, all included studies were deemed low risk.                                                                                                                                                             |
| Concerns regarding applicability                                                                                                                                                                                                                                                                                                                                                  |
| Are there concerns that the target condition as defined by the reference standard does not match the review question? (Low/High/Unclear risk)                                                                                                                                                                                                                                     |
| Notes:                                                                                                                                                                                                                                                                                                                                                                            |
| Studies considered low risk if the reference standard was met i.e., the investigation of an audiovestibular symptom(s) was sought.                                                                                                                                                                                                                                                |
| <b>Flow and Timing</b>                                                                                                                                                                                                                                                                                                                                                            |
| <i>Risk of bias</i>                                                                                                                                                                                                                                                                                                                                                               |
| Could the patient flow have introduced bias? (Low/High/Unclear risk)                                                                                                                                                                                                                                                                                                              |
| <ul style="list-style-type: none"> <li>• Was there an appropriate interval between index test and reference standard?</li> <li>• Did all patients receive the same reference standard?</li> <li>• Were all patients included in the analysis?</li> </ul>                                                                                                                          |
| Notes:                                                                                                                                                                                                                                                                                                                                                                            |
| An appropriate interval index test and reference standard was only considered low risk if a prospective study. If patients within the same cohort were classified with a range of different clinical criteria, then the patients were not deemed to receive the same reference standard. Post hoc exclusions such as technically inadequate MRI was considered high risk of bias. |

### **Supplementary 5. I<sup>2</sup> Interpretation.**

A guide to interpreting I<sup>2</sup> has been published in the Cochrane Handbook for Systematic Reviews of Interventions (2011).

It is noted that thresholds can be misleading since the interpretation of inconsistency depends on several factors. They suggest the following rough guide:

- 0% to 40%: might not be important.
- 30% to 60%: may represent moderate heterogeneity.
- 50% to 90%: may represent substantial heterogeneity.
- 75% to 100%: considerable heterogeneity.

J Higgins. S Green. Cochrane Handbook for Systematic Reviews of Interventions. [Online]. 2011. Available from: [https://handbook-5-1.cochrane.org/front\\_page.htm](https://handbook-5-1.cochrane.org/front_page.htm).
